# Supplementary material for: Variational biomarker pooling with calibration for time-to-event outcomes across multiple clinical studies
Source: BMC Med Res Methodol. 2026 Mar 23;26:97. doi: 10.1186/s12874-026-02827-y (PMC13130471; doi:10.1186/s12874-026-02827-y)
Supplement: Supplementary file 1 — Supplementary Material 1. [file 12874_2026_2827_MOESM1_ESM.xlsx]

## Sheet: Table S1
Table S1 Comparison of operating characteristics under Scenario 1 (exponential baseline scenario) for VIBPe, naive, x-only, and two-stage methods.
N_sample	P_censor	βx	bias*100(se*100)				Coverage rate(%)				MSE*100
			Naive	VIBPe	x_only	two-stage	Naive	VIBPe	x_only	two-stage	Naive	VIBPe	x_only	two-stage
50	0.1	log(1.50)	-27.41(0.09)	1.78(0.34)	-4.29(0.62)	-7.63(0.40)	0	94	94.6	89.3	7.59618	1.20409	4.00175	2.17
		log(1.75)	-41.50(0.09)	1.55(0.34)	-5.83(0.65)	-11.68(0.44)	0	94.3	92.9	80.7	17.3082	1.19695	4.50723	3.34
		log(2.00)	-53.96(0.09)	1.21(0.34)	-6.95(0.66)	-16.18(0.48)	0	93.8	93	73.9	29.2024	1.19806	4.81381	4.9
		log(2.25)	-65.07(0.09)	0.89(0.35)	-7.26(0.69)	-20.52(0.51)	0	93.3	93	66.6	42.4336	1.25938	5.27086	6.82
		log(2.50)	-75.13(0.10)	0.30(0.36)	-7.61(0.71)	-25.14(0.56)	0	93.9	92.7	58.8	56.5304	1.31198	5.57909	9.48
	0.3	log(1.50)	-26.99(0.10)	2.78(0.40)	-3.16(0.67)	-6.76(0.44)	0	94.1	94.1	90.6	7.38924	1.68313	4.65099	2.37
		log(1.75)	-40.92(0.10)	1.96(0.39)	-4.71(0.73)	-11.17(0.46)	0	94.6	92.7	83.1	16.8533	1.5825	5.51657	3.35
		log(2.00)	-53.22(0.10)	1.64(0.40)	-5.35(0.74)	-15.31(0.50)	0	93.6	93.2	76.7	28.4333	1.66559	5.83001	4.88
		log(2.25)	-64.24(0.10)	1.35(0.41)	-6.31(0.74)	-19.90(0.57)	0	93.4	93.9	69.7	41.373	1.69519	5.92298	7.24
		log(2.50)	-74.21(0.10)	0.74(0.42)	-6.69(0.78)	-23.84(0.59)	0	93.8	92.8	65.6	55.1747	1.77442	6.57481	9.15
100	0.1	log(1.50)	-27.37(0.06)	0.99(0.24)	-3.84(0.42)	-4.79(0.28)	0	92.7	93.3	90.1	7.53506	0.583398	1.87329	1.04
		log(1.75)	-41.47(0.07)	0.55(0.24)	-5.99(0.45)	-8.46(0.31)	0	93	91.5	81	17.2404	0.567048	2.36375	1.7
		log(2.00)	-53.91(0.07)	-0.02(0.24)	-7.69(0.44)	-12.60(0.33)	0	92.6	90.5	71.3	29.1057	0.586592	2.55162	2.67
		log(2.25)	-65.02(0.07)	-0.50(0.25)	-8.94(0.46)	-16.67(0.34)	0	93.7	87.5	62.4	42.3248	0.604372	2.89245	3.95
		log(2.50)	-75.07(0.07)	-0.60(0.25)	-9.49(0.47)	-20.73(0.36)	0	93.7	88.5	54.7	56.3968	0.64224	3.13185	5.62
	0.3	log(1.50)	-26.95(0.07)	1.56(0.29)	-3.06(0.45)	-4.52(0.31)	0	92.8	93.9	89.8	7.31478	0.860416	2.15826	1.16
		log(1.75)	-40.91(0.07)	1.38(0.29)	-4.38(0.49)	-7.74(0.33)	0	93.1	92.1	85.8	16.7892	0.836655	2.55029	1.7
		log(2.00)	-53.22(0.07)	0.71(0.28)	-5.93(0.48)	-11.41(0.35)	0	93	92.3	78.2	28.3818	0.785361	2.61929	2.55
		log(2.25)	-64.22(0.07)	0.02(0.29)	-7.31(0.50)	-15.23(0.38)	0	93.4	92.3	68.7	41.3028	0.856313	3.05845	3.78
		log(2.50)	-74.17(0.08)	-0.41(0.29)	-7.52(0.51)	-18.92(0.41)	0	93.7	91.8	61.5	55.0727	0.865939	3.14016	5.23
200	0.1	log(1.50)	-27.37(0.05)	0.65(0.16)	-3.91(0.29)	-3.32(0.19)	0	94.7	92.5	91.4	7.51128	0.274142	0.967312	0.48
		log(1.75)	-41.47(0.05)	0.08(0.16)	-5.41(0.30)	-6.74(0.22)	0	95.2	89.4	79.8	17.2198	0.266541	1.17713	0.94
		log(2.00)	-53.91(0.05)	-0.07(0.17)	-6.15(0.31)	-10.57(0.23)	0	93.5	88.9	67.1	29.0814	0.287319	1.35704	1.66
		log(2.25)	-65.03(0.05)	-0.54(0.17)	-7.39(0.32)	-14.72(0.24)	0	93.9	86.1	50.8	42.308	0.303797	1.59332	2.76
		log(2.50)	-75.06(0.05)	-0.93(0.18)	-7.70(0.32)	-19.14(0.26)	0	94.3	86.7	36.4	56.3667	0.316638	1.64739	4.32
	0.3	log(1.50)	-26.91(0.05)	0.74(0.19)	-2.61(0.33)	-3.00(0.21)	0	93.6	92.3	91.9	7.26717	0.369303	1.16812	0.52
		log(1.75)	-40.85(0.05)	0.67(0.19)	-4.23(0.33)	-5.51(0.21)	0	94.1	91.7	87.3	16.7104	0.357662	1.25393	0.76
		log(2.00)	-53.16(0.05)	-0.00(0.19)	-5.85(0.32)	-8.84(0.24)	0	94.4	91.9	78.3	28.2903	0.377984	1.38502	1.35
		log(2.25)	-64.19(0.05)	-0.42(0.20)	-6.54(0.33)	-12.47(0.26)	0	93.9	90.9	64.6	41.2281	0.419513	1.53007	2.24
		log(2.50)	-74.16(0.05)	-0.97(0.21)	-7.00(0.36)	-16.62(0.27)	0	93.8	88.2	52.4	55.0205	0.443161	1.81376	3.49

## Sheet: Table S2
Table S2 Comparison of operating characteristics under scenario 6 (Weibull baseline scenario) for the VIBPe, VIBPwg, VIBPwl, naive, x-only, and two-stage methods.
Rho	P_censor	βx	bias*100(se*100)						Coverage rate(%)						MSE*100
			Naive	VIBPe	VIBPwg	VIBPwl	x_only	two-stage	Naive	VIBPe	VIBPwg	VIBPwl	x_only	two-stage	Naive	VIBPe	VIBPwg	VIBPwl	x_only	two-stage
0.5	0.1	log(1.50)	-27.31(0.06)	83.75(0.55)	2.13(0.28)	2.41(0.28)	-4.77(0.40)	-4.63(0.28)	0	3.9	91.7	91.3	92.6	91.2	7.4984	73.1975	0.831412	0.856082	1.85011	1
		log(1.75)	-41.40(0.07)	87.32(0.52)	1.56(0.30)	1.94(0.30)	-6.77(0.43)	-8.17(0.31)	0	1.2	90.8	90.2	90.4	82.3	17.1833	78.9496	0.898555	0.924652	2.33671	1.6
		log(2.00)	-53.83(0.07)	90.91(0.52)	1.35(0.30)	1.81(0.31)	-7.28(0.46)	-12.06(0.34)	0	1	91.5	91.2	90	72.8	29.0258	85.3411	0.942792	0.970965	2.60638	2.64
		log(2.25)	-64.96(0.07)	92.29(0.55)	0.70(0.31)	1.24(0.31)	-8.48(0.46)	-15.92(0.36)	0	2.7	93.4	92.6	88.7	64.2	42.2439	88.182	0.963614	0.987895	2.81186	3.82
		log(2.50)	-75.01(0.07)	92.88(0.60)	0.02(0.32)	0.63(0.32)	-9.21(0.46)	-20.14(0.38)	0	6.5	93.5	93.4	89.1	54.9	56.3136	89.89	1.012	1.0299	2.94684	5.48
	0.3	log(1.50)	-26.79(0.07)	83.87(0.62)	2.06(0.30)	2.31(0.30)	-3.53(0.46)	-4.59(0.29)	0	6.5	92.6	92.4	93.6	91.4	7.22791	74.2141	0.952909	0.978649	2.19924	1.06
		log(1.75)	-40.71(0.07)	87.29(0.54)	2.31(0.32)	2.67(0.32)	-4.21(0.47)	-7.52(0.33)	0	3.1	90.8	90.2	93	86.8	16.6285	79.1547	1.08013	1.1154	2.34436	1.63
		log(2.00)	-53.01(0.07)	90.11(0.57)	1.62(0.35)	2.08(0.35)	-5.18(0.51)	-11.06(0.35)	0	5.3	90.1	89.9	92	78	28.1579	84.5038	1.2259	1.26251	2.83861	2.47
		log(2.25)	-64.02(0.08)	92.34(0.60)	1.24(0.35)	1.77(0.36)	-6.19(0.51)	-14.14(0.40)	0	11.6	92.5	92.1	91.5	69.6	41.0469	88.8078	1.27376	1.31089	3.02016	3.62
		log(2.50)	-73.97(0.08)	91.87(0.64)	0.17(0.36)	0.79(0.36)	-7.02(0.52)	-18.47(0.39)	0	20.4	92.4	92.5	91.5	62.7	54.7792	88.5331	1.29957	1.32757	3.19189	4.91
1	0.1	log(1.50)	-27.39(0.06)	0.86(0.24)	1.66(0.28)	1.91(0.28)	-3.87(0.41)	-4.86(0.28)	0	92.8	91.3	90.7	93.3	89.8	7.54187	0.605065	0.797921	0.817819	1.83045	1.05
		log(1.75)	-41.48(0.07)	0.45(0.24)	1.34(0.29)	1.67(0.29)	-5.89(0.44)	-8.50(0.32)	0	92.5	92.2	91.2	91.8	81	17.2463	0.580213	0.860219	0.884415	2.25823	1.72
		log(2.00)	-53.91(0.07)	0.03(0.25)	0.78(0.31)	1.19(0.31)	-7.23(0.44)	-12.65(0.34)	0	91.9	91.6	91.9	91	70.9	29.1104	0.607316	0.937074	0.963725	2.45427	2.74
		log(2.25)	-65.02(0.07)	-0.50(0.25)	-0.18(0.32)	0.31(0.32)	-8.94(0.46)	-16.84(0.35)	0	93.6	92.9	92	87.5	61.7	42.3261	0.623852	1.02877	1.05253	2.87796	4.06
		log(2.50)	-75.08(0.07)	-0.58(0.26)	-0.56(0.33)	0.02(0.33)	-9.33(0.48)	-20.91(0.37)	0	93.7	92.2	92.1	88.1	54.6	56.4095	0.657016	1.06952	1.09406	3.1439	5.75
	0.3	log(1.50)	-26.94(0.07)	1.54(0.29)	2.13(0.32)	2.35(0.32)	-3.02(0.46)	-4.42(0.31)	0	93.1	92	91.8	94.1	90.2	7.3126	0.876134	1.04179	1.06504	2.19163	1.16
		log(1.75)	-40.90(0.07)	1.40(0.29)	2.16(0.33)	2.46(0.33)	-4.07(0.50)	-7.64(0.33)	0	93.2	90.8	90.9	91.8	86.2	16.7846	0.868881	1.11725	1.14844	2.63745	1.69
		log(2.00)	-53.21(0.07)	0.76(0.28)	1.42(0.32)	1.80(0.32)	-5.64(0.48)	-11.54(0.35)	0	93.3	92.6	92.4	92.4	77.9	28.3712	0.803453	1.05771	1.08778	2.65772	2.58
		log(2.25)	-64.21(0.07)	0.04(0.29)	0.48(0.34)	0.94(0.34)	-6.92(0.50)	-15.29(0.38)	0	93.7	93.1	92.8	92.7	68.8	41.2804	0.839337	1.16169	1.19099	3.02268	3.82
		log(2.50)	-74.15(0.08)	-0.49(0.29)	-0.46(0.35)	0.07(0.35)	-7.38(0.51)	-19.02(0.41)	0	93.9	93.3	92.9	92	61.2	55.0321	0.844764	1.22857	1.25371	3.12801	5.27
1.5	0.1	log(1.50)	-27.43(0.06)	-19.53(0.14)	1.62(0.29)	1.82(0.29)	-4.04(0.43)	-4.85(0.29)	0	0.8	90.7	90.5	92.7	89.7	7.56546	3.99857	0.864289	0.875128	2.02921	1.07
		log(1.75)	-41.53(0.07)	-26.26(0.14)	1.65(0.30)	1.91(0.30)	-4.93(0.43)	-8.51(0.32)	0	0	91.9	91.5	92.1	81.8	17.2874	7.09725	0.914583	0.92784	2.09578	1.74
		log(2.00)	-53.95(0.07)	-31.91(0.15)	0.98(0.31)	1.30(0.31)	-6.35(0.45)	-12.60(0.34)	0	0	91.8	91.5	90.3	73.1	29.1541	10.4061	0.993373	1.00402	2.39212	2.72
		log(2.25)	-65.08(0.07)	-36.61(0.16)	0.43(0.32)	0.81(0.32)	-7.02(0.47)	-17.17(0.35)	0	0	92	91.8	89.7	61.7	42.3943	13.6508	1.05272	1.06073	2.73526	4.17
		log(2.50)	-75.13(0.07)	-40.57(0.16)	-0.39(0.33)	0.07(0.33)	-8.23(0.48)	-21.16(0.37)	0	0	93.3	93	89.9	54	56.4882	16.7258	1.07346	1.07472	2.99466	5.86
	0.3	log(1.50)	-27.08(0.07)	-15.95(0.18)	1.88(0.31)	2.08(0.31)	-3.81(0.47)	-4.71(0.31)	0	19.4	91.5	91.5	92.8	90.8	7.38942	2.86144	0.995633	1.00914	2.37891	1.18
		log(1.75)	-41.06(0.07)	-21.87(0.18)	2.10(0.32)	2.36(0.32)	-3.81(0.47)	-7.73(0.33)	0	4.2	91.8	91.8	94.3	85.9	16.9104	5.10344	1.04146	1.05817	2.39864	1.66
		log(2.00)	-53.40(0.07)	-27.25(0.19)	1.50(0.33)	1.80(0.33)	-5.25(0.50)	-11.33(0.34)	0	1	93.4	92.8	93	79.1	28.5749	7.76698	1.11461	1.13077	2.73971	2.46
		log(2.25)	-64.43(0.08)	-31.85(0.19)	0.87(0.35)	1.23(0.35)	-5.61(0.52)	-15.83(0.37)	0	0.2	91.4	91.4	92.2	69.5	41.573	10.5165	1.23943	1.25332	3.05593	3.89
		log(2.50)	-74.37(0.08)	-35.76(0.20)	0.11(0.36)	0.52(0.36)	-6.49(0.56)	-19.67(0.40)	0	0.3	93	92.9	90.2	59.5	55.3671	13.1786	1.27807	1.28541	3.50526	5.44

## Sheet: Table S3
Table S3 Comparison of operating characteristics under Scenario 2 (exponential high censoring scenario) for VIBPe, naive, x-only, and two-stage methods.
N_sample	P_censor	βx	bias*100(se*100)				Coverage rate(%)				MSE*100
			Naive	VIBPe	x_only	two-stage	Naive	VIBPe	x_only	two-stage	Naive	VIBPe	x_only	two-stage
50	0.5	log(1.50)	-26.63(0.12)	4.28(0.49)	-2.45(0.77)	-6.41(0.50)	0	93.8	95.3	92.2	7.24272	2.59429	6.02998	2.88
		log(1.75)	-40.45(0.12)	4.28(0.49)	-2.88(0.79)	-9.86(0.51)	0	92.1	95.6	88.8	16.515	2.5631	6.31324	3.54
		log(2.00)	-52.60(0.13)	3.68(0.49)	-4.32(0.80)	-14.13(0.54)	0	92.4	94.1	83.9	27.8252	2.56897	6.52196	4.87
		log(2.25)	-63.47(0.13)	3.09(0.49)	-3.79(0.87)	-17.94(0.59)	0	92.2	94	75.9	40.4396	2.45062	7.63317	6.65
		log(2.50)	-73.34(0.13)	1.91(0.49)	-4.56(0.88)	-21.68(0.62)	0	93.8	94.7	71.3	53.947	2.44353	7.90044	8.57
	0.7	log(1.50)	-26.38(0.16)	3.62(0.64)	-0.39(0.98)	-6.60(0.60)	0.2	92.4	94.9	94.1	7.21131	4.27814	9.66236	4.07
		log(1.75)	-39.92(0.16)	3.96(0.64)	-0.84(1.05)	-9.12(0.63)	0	92.7	94.8	90.3	16.1932	4.26816	10.9639	4.8
		log(2.00)	-51.75(0.16)	3.65(0.63)	-1.32(1.06)	-12.22(0.66)	0	92.2	94	89.4	27.0446	4.14145	11.175	5.85
		log(2.25)	-62.40(0.16)	2.66(0.61)	-1.41(1.11)	-15.43(0.69)	0	93	94.7	85.6	39.2012	3.82365	12.4173	7.09
		log(2.50)	-72.03(0.16)	2.09(0.62)	-0.67(1.10)	-18.97(0.70)	0	93.3	95	82	52.143	3.8381	12.0204	8.45
100	0.5	log(1.50)	-26.53(0.08)	1.76(0.33)	-1.73(0.51)	-4.13(0.34)	0	93.4	95.9	94.1	7.10755	1.09944	2.65372	1.31
		log(1.75)	-40.29(0.08)	2.03(0.33)	-1.80(0.56)	-6.70(0.37)	0	93	95	89.8	16.3069	1.12809	3.13366	1.78
		log(2.00)	-52.43(0.09)	1.07(0.35)	-3.64(0.57)	-9.83(0.39)	0	92.2	93.8	82.9	27.5605	1.22041	3.42981	2.51
		log(2.25)	-63.28(0.09)	0.75(0.35)	-3.40(0.60)	-13.01(0.42)	0	93	94.3	77.4	40.1243	1.23038	3.72029	3.47
		log(2.50)	-73.15(0.09)	-0.05(0.35)	-3.69(0.62)	-16.82(0.44)	0	93.7	94	69.6	53.5918	1.21159	3.96491	4.74
	0.7	log(1.50)	-26.13(0.11)	2.51(0.42)	0.47(0.68)	-3.08(0.44)	0	93.6	95.1	94.7	6.94609	1.82163	4.61641	2.02
		log(1.75)	-39.59(0.11)	2.16(0.44)	-0.61(0.72)	-5.47(0.44)	0	92.6	95.1	92.9	15.7942	1.96489	5.16581	2.26
		log(2.00)	-51.55(0.11)	2.13(0.43)	-1.81(0.71)	-7.44(0.47)	0	93.2	94.1	90.5	26.6989	1.93466	5.01806	2.79
		log(2.25)	-62.24(0.11)	1.62(0.43)	-1.72(0.72)	-10.39(0.50)	0	93.8	95.2	87.6	38.8672	1.88589	5.22132	3.54
		log(2.50)	-71.92(0.12)	0.87(0.42)	-1.74(0.75)	-13.42(0.51)	0	94.6	94.7	83	51.8546	1.79658	5.69587	4.42
200	0.5	log(1.50)	-26.63(0.06)	1.43(0.23)	-1.42(0.38)	-2.26(0.24)	0	94.4	93.4	93.5	7.12552	0.541636	1.4604	0.61
		log(1.75)	-40.38(0.06)	1.00(0.23)	-3.22(0.38)	-4.61(0.25)	0	94.1	93.9	89.9	16.3419	0.546073	1.52272	0.84
		log(2.00)	-52.52(0.06)	0.39(0.24)	-4.53(0.40)	-7.43(0.27)	0	94.2	92.8	84.4	27.6189	0.571554	1.77292	1.26
		log(2.25)	-63.38(0.06)	-0.01(0.24)	-4.61(0.39)	-10.55(0.28)	0	94.1	94.3	76.9	40.2024	0.593087	1.69728	1.91
		log(2.50)	-73.20(0.06)	-0.84(0.25)	-5.62(0.41)	-13.71(0.30)	0	93.3	91	66.7	53.6144	0.631199	2.00339	2.79
	0.7	log(1.50)	-26.24(0.08)	1.14(0.29)	-1.37(0.46)	-1.83(0.30)	0	93.7	95	94.7	6.94129	0.838265	2.14828	0.92
		log(1.75)	-39.76(0.08)	1.24(0.30)	-1.58(0.49)	-3.52(0.31)	0	92	93.9	91.8	15.8639	0.930046	2.4099	1.09
		log(2.00)	-51.63(0.08)	0.77(0.31)	-2.59(0.47)	-5.53(0.33)	0	93.2	94.9	90.3	26.7164	0.943624	2.25501	1.4
		log(2.25)	-62.27(0.08)	-0.05(0.32)	-3.44(0.53)	-8.13(0.33)	0	92.4	94.3	86.2	38.8358	1.01019	2.87574	1.77
		log(2.50)	-71.93(0.08)	-0.70(0.32)	-2.93(0.54)	-10.72(0.35)	0	92	92.9	82.8	51.8018	1.01848	2.99563	2.36

## Sheet: Table S4
Table S4 Comparison of operating characteristics under scenario 7 (Weibull high censoring scenario) for the VIBPe, VIBPwg, VIBPwl, naive, x-only, and two-stage methods.
Rho	P_censor	βx	bias*100(se*100)						Coverage rate(%)						MSE*100
			Naive	VIBPe	VIBPwg	VIBPwl	x_only	two-stage	Naive	VIBPe	VIBPwg	VIBPwl	x_only	two-stage	Naive	VIBPe	VIBPwg	VIBPwl	x_only	two-stage
0.5	0.5	log(1.50)	-26.39(0.08)	79.41(0.84)	2.31(0.35)	2.55(0.35)	-1.74(0.52)	-3.68(0.34)	0	25.8	92.9	92.9	95	94.5	7.03643	70.1678	1.2622	1.29112	2.75681	1.31
		log(1.75)	-40.14(0.08)	84.83(0.70)	2.30(0.36)	2.65(0.36)	-2.63(0.52)	-6.41(0.37)	0	8.2	93	93.1	94.6	89.4	16.1819	76.797	1.36047	1.39926	2.81881	1.76
		log(2.00)	-52.23(0.09)	89.43(0.64)	1.99(0.36)	2.44(0.36)	-2.93(0.54)	-9.54(0.38)	0	4.7	93.4	93.4	95.7	83.9	27.3542	84.0802	1.34391	1.38687	2.97989	2.37
		log(2.25)	-63.08(0.09)	91.83(0.66)	1.23(0.39)	1.77(0.39)	-4.18(0.58)	-12.56(0.42)	0	6.9	92.3	92.7	93.8	78	39.8716	88.7089	1.50217	1.546	3.51647	3.32
		log(2.50)	-72.92(0.09)	93.75(0.61)	0.25(0.39)	0.87(0.39)	-4.93(0.59)	-15.83(0.43)	0	11.4	93.3	94.5	93.9	72.9	53.2472	91.55	1.50418	1.53961	3.74041	4.33
	0.7	log(1.50)	-26.02(0.11)	46.86(1.39)	2.97(0.43)	3.21(0.43)	0.16(0.70)	-2.82(0.43)	0	72	93.1	93.6	93.7	95.3	6.89108	41.3956	1.93827	1.98094	4.88173	1.89
		log(1.75)	-39.54(0.11)	61.42(1.28)	2.53(0.44)	2.80(0.45)	-1.41(0.71)	-5.02(0.44)	0	53.1	93.2	94.4	93.7	93.1	15.7622	54.1801	1.99024	2.08445	5.08878	2.16
		log(2.00)	-51.42(0.11)	74.76(1.13)	2.75(0.44)	3.23(0.45)	-1.00(0.71)	-7.14(0.47)	0	35.6	92.4	94.4	93.9	91	26.5681	68.7403	2.05396	2.13763	5.06906	2.74
		log(2.25)	-62.02(0.11)	85.18(1.08)	1.98(0.45)	2.36(0.48)	-1.15(0.72)	-10.38(0.48)	0	21.3	92.8	95.2	94.3	86.9	38.6008	84.2868	2.06003	2.37196	5.19207	3.36
		log(2.50)	-71.66(0.11)	90.18(1.02)	1.29(0.47)	1.65(0.53)	-1.73(0.77)	-12.55(0.51)	0	15.6	92.6	96.5	94.5	84.1	51.4798	91.7242	2.18528	2.83126	5.90643	4.17
1	0.5	log(1.50)	-26.52(0.08)	1.56(0.33)	1.88(0.34)	2.09(0.35)	-1.80(0.52)	-4.18(0.34)	0	92.7	92.6	92.3	95.1	93.2	7.10351	1.12506	1.22454	1.24744	2.75234	1.34
		log(1.75)	-40.30(0.09)	1.90(0.33)	2.40(0.36)	2.70(0.36)	-1.85(0.56)	-6.93(0.37)	0	92.6	92.6	92.2	94.7	89.2	16.3116	1.14141	1.34591	1.38084	3.16846	1.83
		log(2.00)	-52.44(0.09)	0.92(0.35)	1.35(0.38)	1.72(0.39)	-4.05(0.57)	-10.07(0.39)	0	92.2	92.3	92	93.7	82.7	27.5708	1.22698	1.479	1.5161	3.38923	2.55
		log(2.25)	-63.30(0.09)	0.55(0.35)	0.90(0.39)	1.34(0.39)	-3.74(0.60)	-13.46(0.41)	0	93.7	92.9	92.7	93.8	76.2	40.1392	1.2043	1.50396	1.54512	3.70842	3.51
		log(2.50)	-73.14(0.09)	-0.36(0.35)	-0.15(0.39)	0.37(0.39)	-4.13(0.62)	-17.37(0.43)	0	93.7	94	93.8	93.4	69.2	53.573	1.20652	1.51693	1.55195	3.98503	4.88
	0.7	log(1.50)	-26.15(0.11)	2.13(0.42)	2.24(0.43)	2.47(0.43)	0.12(0.69)	-3.62(0.43)	0	93.7	94.1	93.8	95.1	94.6	6.96012	1.81671	1.87724	1.91298	4.71312	2.01
		log(1.75)	-39.61(0.11)	2.06(0.44)	2.22(0.45)	2.54(0.45)	-0.22(0.73)	-5.83(0.44)	0	92.8	93.4	93.5	94.7	93.3	15.8166	1.97551	2.04009	2.08755	5.35508	2.24
		log(2.00)	-51.55(0.11)	1.92(0.44)	2.15(0.46)	2.58(0.46)	-1.58(0.71)	-7.96(0.47)	0	93.2	94.1	93.7	94.2	89.5	26.7008	1.96506	2.12668	2.18735	5.04943	2.84
		log(2.25)	-62.24(0.12)	1.46(0.43)	1.63(0.46)	2.15(0.46)	-1.41(0.72)	-10.74(0.49)	0	93.5	92.9	92.4	95.4	86.4	38.8681	1.90364	2.10697	2.17382	5.14899	3.56
		log(2.50)	-71.91(0.12)	0.81(0.42)	0.90(0.45)	1.51(0.45)	-1.56(0.75)	-13.79(0.51)	0	95	94.4	94	95.1	82.5	51.8433	1.76949	2.02325	2.09226	5.57694	4.45
1.5	0.5	log(1.50)	-26.59(0.08)	-11.36(0.22)	2.27(0.33)	2.47(0.33)	-1.55(0.53)	-3.81(0.34)	0	65.2	94.3	94.1	95	94.4	7.13873	1.76214	1.1335	1.14918	2.83522	1.29
		log(1.75)	-40.42(0.08)	-16.37(0.22)	2.38(0.35)	2.64(0.35)	-2.50(0.54)	-6.56(0.36)	0	40.8	92.6	92.7	94.5	89	16.4135	3.17135	1.29905	1.32017	3.00716	1.69
		log(2.00)	-52.62(0.09)	-20.92(0.23)	2.01(0.36)	2.33(0.37)	-2.77(0.55)	-9.93(0.39)	0	23.4	92.8	92.7	95.1	84	27.7581	4.89305	1.37179	1.39501	3.07828	2.49
		log(2.25)	-63.50(0.09)	-25.33(0.24)	1.07(0.39)	1.45(0.39)	-4.15(0.57)	-13.72(0.42)	0	12	93	92.8	94.6	75.6	40.3941	6.97732	1.55454	1.57352	3.41307	3.61
		log(2.50)	-73.36(0.09)	-29.06(0.24)	0.25(0.39)	0.68(0.39)	-4.11(0.62)	-16.72(0.42)	0	7.1	93.5	93.1	93.9	72.6	53.8865	9.01896	1.48402	1.49771	3.9674	4.58
	0.7	log(1.50)	-26.18(0.11)	-6.91(0.31)	1.88(0.41)	2.12(0.41)	-1.51(0.68)	-3.48(0.42)	0	90.1	93.8	93.7	94.4	96.3	6.9779	1.46643	1.72354	1.74816	4.63807	1.9
		log(1.75)	-39.77(0.11)	-10.53(0.32)	2.27(0.44)	2.58(0.44)	-0.51(0.69)	-5.93(0.47)	0	81.9	93.4	92.9	95.4	93.2	15.9392	2.15307	2.00574	2.03754	4.75874	2.52
		log(2.00)	-51.72(0.11)	-14.06(0.32)	2.05(0.45)	2.44(0.45)	-2.22(0.72)	-8.00(0.48)	0	72	92.8	92.8	94.7	88.9	26.876	3.02073	2.07694	2.1162	5.24764	2.9
		log(2.25)	-62.47(0.11)	-17.59(0.32)	1.47(0.45)	1.94(0.46)	-2.35(0.73)	-10.83(0.50)	0	62.4	93.3	92.8	94.5	86.8	39.1579	4.12959	2.07728	2.11538	5.44835	3.63
		log(2.50)	-72.17(0.12)	-21.03(0.32)	0.49(0.46)	1.04(0.46)	-2.80(0.72)	-13.78(0.51)	0	49.2	93.6	93.5	95.6	82.6	52.2186	5.45319	2.13044	2.16656	5.32126	4.5

## Sheet: Table S5
Table S5 Comparison of operating characteristics under Scenario 3 (exponential sparser calibration subset scenario) for VIBPe, naive, x-only, and two-stage methods.
N_sample	P_censor	βx	bias*100(se*100)				Coverage rate(%)				MSE*100
			Naive	VIBPe	x_only	two-stage	Naive	VIBPe	x_only	two-stage	Naive	VIBPe	x_only	two-stage
50	0.1	log(1.50)	-27.47(0.09)	5.81(0.44)	-4.20(0.96)	-13.14(0.44)	0	93.5	92.8	72.6	7.62998	2.29141	9.33771	3.67
		log(1.75)	-41.58(0.09)	5.35(0.43)	-7.51(1.03)	-19.18(0.55)	0	91.9	92.6	63	17.3727	2.14367	11.1094	6.7
		log(2.00)	-54.00(0.09)	3.96(0.50)	-7.98(1.10)	-24.69(0.64)	0	90.7	92.6	55.4	29.2502	2.69261	12.6342	10.19
		log(2.25)	-65.09(0.09)	3.34(0.50)	-8.46(1.17)	-29.87(0.69)	0	91.5	91.5	52.2	42.4586	2.64011	14.3094	13.7
		log(2.50)	-75.14(0.09)	2.66(0.46)	-8.85(1.21)	-35.22(0.75)	0	91.9	91.5	48.2	56.5507	2.17764	15.3653	17.96
	0.3	log(1.50)	-27.06(0.10)	7.50(0.55)	-4.72(1.07)	-13.19(0.46)	0	91.9	94.4	75.9	7.42296	3.54849	11.6481	3.87
		log(1.75)	-40.98(0.10)	7.10(0.50)	-3.34(1.17)	-18.92(0.53)	0	91.7	92.4	65.2	16.9002	3.00239	13.913	6.43
		log(2.00)	-53.31(0.10)	5.37(0.48)	-6.45(1.16)	-24.42(0.61)	0	92.3	93.2	58.6	28.5229	2.57016	13.9392	9.72
		log(2.25)	-64.33(0.10)	4.00(0.48)	-7.13(1.19)	-29.93(0.69)	0	93.5	92.3	50.9	41.4852	2.43779	14.7033	13.74
		log(2.50)	-74.26(0.10)	3.65(0.51)	-7.05(1.26)	-34.45(0.79)	0	93	93.1	48	55.2527	2.78317	16.4369	18.11
100	0.1	log(1.50)	-27.46(0.07)	2.80(0.27)	-3.26(0.60)	-7.85(0.31)	0	93.1	93.8	80.7	7.58638	0.809335	3.75935	1.58
		log(1.75)	-41.56(0.07)	2.19(0.27)	-5.99(0.66)	-11.84(0.38)	0	94.2	90.9	72.6	17.3191	0.792513	4.65169	2.86
		log(2.00)	-53.97(0.07)	1.67(0.27)	-6.51(0.68)	-16.78(0.44)	0	93	91.7	60.6	29.1771	0.776508	5.11003	4.71
		log(2.25)	-65.09(0.07)	1.38(0.29)	-7.36(0.69)	-20.96(0.47)	0	93.6	91.5	55.2	42.4202	0.87023	5.30662	6.61
		log(2.50)	-75.13(0.07)	0.52(0.30)	-7.83(0.71)	-25.51(0.51)	0	93.2	92.6	47.6	56.4916	0.890794	5.64482	9.07
	0.3	log(1.50)	-27.02(0.08)	3.28(0.34)	-4.70(0.70)	-7.70(0.33)	0	93.1	93.5	81.7	7.35832	1.27868	5.05836	1.7
		log(1.75)	-40.95(0.08)	2.67(0.32)	-5.86(0.69)	-12.03(0.37)	0	93.5	94.4	73.3	16.83	1.07017	5.0476	2.83
		log(2.00)	-53.25(0.08)	1.74(0.32)	-6.58(0.72)	-16.19(0.42)	0	94.3	92.5	65.1	28.4168	1.05589	5.5606	4.35
		log(2.25)	-64.26(0.08)	1.43(0.34)	-7.11(0.72)	-20.60(0.48)	0	93.9	92.9	58.5	41.3464	1.14656	5.71395	6.57
		log(2.50)	-74.22(0.08)	0.77(0.35)	-7.26(0.77)	-24.58(0.50)	0	92.8	93.1	52.6	55.1466	1.22109	6.48984	8.5
200	0.1	log(1.50)	-27.43(0.05)	1.21(0.18)	-3.50(0.41)	-5.17(0.22)	0	94.6	93.7	84.4	7.54894	0.354677	1.84462	0.76
		log(1.75)	-41.52(0.05)	0.80(0.19)	-5.55(0.44)	-8.52(0.26)	0	93.7	91.9	73.6	17.2638	0.367477	2.23001	1.4
		log(2.00)	-53.94(0.05)	0.44(0.20)	-6.67(0.45)	-12.64(0.29)	0	93.5	91.2	61	29.1219	0.401037	2.46763	2.45
		log(2.25)	-65.05(0.05)	-0.03(0.21)	-7.40(0.47)	-16.90(0.31)	0	93.1	90.6	50.1	42.3376	0.439575	2.74697	3.84
		log(2.50)	-75.09(0.05)	-0.60(0.21)	-8.51(0.48)	-21.55(0.34)	0	94.4	90.1	41.4	56.4043	0.449416	2.99528	5.81
	0.3	log(1.50)	-26.98(0.05)	1.87(0.22)	-3.83(0.45)	-4.57(0.24)	0	92.9	93.9	86	7.30769	0.535031	2.21295	0.78
		log(1.75)	-40.93(0.05)	1.39(0.22)	-4.96(0.48)	-7.37(0.26)	0	94.4	91.9	80.4	16.7796	0.499567	2.56753	1.24
		log(2.00)	-53.22(0.05)	0.35(0.23)	-5.82(0.49)	-11.50(0.30)	0	94.3	92.3	68.1	28.3483	0.512652	2.7541	2.23
		log(2.25)	-64.22(0.05)	-0.39(0.23)	-5.56(0.50)	-16.04(0.32)	0	94.7	92.9	55.5	41.2759	0.538382	2.83857	3.59
		log(2.50)	-74.17(0.05)	-1.02(0.24)	-6.34(0.52)	-19.71(0.35)	0	95	91.7	46.7	55.0384	0.568838	3.12513	5.09

## Sheet: Table S6
Table S6 Comparison of operating characteristics under scenario 8 (Weibull sparser calibration subset scenario) for the VIBPe, VIBPwg, VIBPwl, naive, x-only, and two-stage methods.
Rho	P_censor	βx	bias*100(se*100)						Coverage rate(%)						MSE*100
			Naive	VIBPe	VIBPwg	VIBPwl	x_only	two-stage	Naive	VIBPe	VIBPwg	VIBPwl	x_only	two-stage	Naive	VIBPe	VIBPwg	VIBPwl	x_only	two-stage
0.5	0.1	log(1.50)	-27.36(0.07)	63.82(1.23)	4.47(0.37)	5.01(0.36)	-5.79(0.62)	-8.13(0.32)	0	68.2	89.4	91	92.5	78.3	7.5339	55.7403	1.55837	1.51345	4.2277	1.68
		log(1.75)	-41.47(0.07)	68.46(1.15)	4.63(0.34)	5.18(0.35)	-7.57(0.63)	-11.78(0.37)	0	67.4	89.9	93	90.9	71.7	17.2452	60.1204	1.40091	1.48464	4.57271	2.76
		log(2.00)	-53.90(0.07)	64.02(1.34)	3.36(0.36)	3.34(0.43)	-9.21(0.66)	-16.66(0.42)	0	74.2	90.6	94.7	89.8	62.4	29.104	58.8521	1.42424	1.93736	5.19022	4.57
		log(2.25)	-65.01(0.07)	50.52(1.67)	1.75(0.37)	1.18(0.48)	-10.89(0.66)	-21.46(0.50)	0	85.1	91.8	97	90.2	53.7	42.3157	53.5288	1.37738	2.28247	5.56622	7.06
		log(2.50)	-75.06(0.07)	31.21(2.06)	0.45(0.39)	-1.59(0.60)	-10.81(0.70)	-26.01(0.51)	0	93.5	92.5	96.9	90.5	48.1	56.3935	52.0289	1.51331	3.59833	6.05642	9.39
	0.3	log(1.50)	-26.87(0.07)	62.83(1.19)	5.28(0.39)	5.46(0.42)	-3.65(0.68)	-7.70(0.33)	0	77.4	90.5	90.4	93.5	83	7.27809	53.526	1.77777	2.07442	4.68925	1.65
		log(1.75)	-40.77(0.08)	62.38(1.28)	5.32(0.38)	5.86(0.38)	-4.94(0.69)	-11.12(0.38)	0	77.6	89.6	89.2	92.8	75.2	16.6757	55.1896	1.71496	1.81255	5.04268	2.71
		log(2.00)	-53.06(0.08)	55.82(1.54)	4.60(0.39)	5.25(0.39)	-5.90(0.71)	-15.05(0.42)	0	85.1	90.8	90.5	94.5	68.7	28.2105	54.8263	1.73068	1.83188	5.38839	4.06
		log(2.25)	-64.07(0.08)	40.28(1.84)	3.06(0.39)	3.79(0.39)	-6.82(0.73)	-19.51(0.48)	0	90.7	92	91.3	93	60.1	41.1136	50.062	1.60762	1.69165	5.85307	6.14
		log(2.50)	-74.03(0.08)	13.23(2.27)	1.16(0.40)	1.97(0.40)	-6.86(0.76)	-24.72(0.51)	0	94.1	92.9	92.7	92.4	52.6	54.8576	53.1598	1.59143	1.64617	6.30882	8.7
1	0.1	log(1.50)	-27.46(0.07)	2.88(0.26)	4.84(0.33)	5.17(0.33)	-3.53(0.60)	-7.64(0.30)	0	93.3	90	89.8	94.1	82.5	7.58496	0.775719	1.30034	1.35714	3.74644	1.48
		log(1.75)	-41.56(0.07)	2.35(0.27)	4.41(0.34)	4.85(0.34)	-5.49(0.66)	-11.67(0.37)	0	94.2	90.1	89.8	90.8	74.2	17.3168	0.774934	1.33115	1.39888	4.63885	2.74
		log(2.00)	-53.98(0.07)	1.94(0.27)	3.91(0.36)	4.47(0.36)	-5.87(0.68)	-16.88(0.43)	0	92.7	90.2	89.7	92.3	61	29.1822	0.786521	1.41675	1.49558	5.03359	4.67
		log(2.25)	-65.10(0.07)	1.63(0.29)	2.92(0.35)	3.58(0.36)	-7.05(0.68)	-21.16(0.46)	0	93.9	92.7	92.1	91.8	54.2	42.4225	0.838933	1.32944	1.40539	5.14122	6.59
		log(2.50)	-75.13(0.07)	0.77(0.30)	1.37(0.38)	2.11(0.38)	-7.80(0.72)	-25.39(0.50)	0	93.4	92.3	91.8	92.2	48.3	56.496	0.881413	1.43565	1.50409	5.77082	8.95
	0.3	log(1.50)	-27.01(0.07)	3.27(0.34)	4.84(0.36)	5.05(0.38)	-4.99(0.70)	-7.55(0.33)	0	93.1	91.6	91.5	93.5	82.2	7.34912	1.23029	1.54753	1.70445	5.08942	1.67
		log(1.75)	-40.94(0.08)	2.89(0.31)	4.51(0.36)	4.79(0.39)	-5.92(0.71)	-11.67(0.38)	0	93.5	91.2	90.9	93.5	73.8	16.8189	1.05452	1.50903	1.75244	5.3274	2.8
		log(2.00)	-53.24(0.08)	2.17(0.32)	3.95(0.38)	4.47(0.39)	-5.72(0.72)	-15.79(0.41)	0	93.8	91.7	91.2	92.4	67.2	28.4049	1.06714	1.63313	1.71221	5.44066	4.18
		log(2.25)	-64.25(0.08)	1.79(0.34)	3.08(0.41)	3.68(0.41)	-6.04(0.73)	-20.29(0.48)	0	93.5	90.4	90	93.6	59.4	41.3355	1.16209	1.76653	1.84917	5.64815	6.42
		log(2.50)	-74.22(0.08)	0.95(0.34)	1.43(0.41)	2.12(0.41)	-7.09(0.75)	-24.46(0.51)	0	93.3	91.7	90.7	93.7	52.7	55.145	1.19473	1.67246	1.73901	6.12031	8.58
1.5	0.1	log(1.50)	-27.54(0.07)	-20.60(0.13)	4.01(0.31)	4.16(0.33)	-3.93(0.61)	-8.43(0.31)	0	0.9	91.6	91.3	94.5	80	7.62937	4.4212	1.13303	1.22991	3.8828	1.66
		log(1.75)	-41.65(0.07)	-27.64(0.14)	3.89(0.33)	4.20(0.33)	-4.21(0.64)	-12.69(0.36)	0	0.2	91.2	91	94	69.5	17.3935	7.84307	1.23416	1.26602	4.24375	2.93
		log(2.00)	-54.08(0.07)	-33.48(0.15)	3.16(0.35)	3.54(0.35)	-5.28(0.68)	-17.40(0.41)	0	0	91.8	91.4	91.9	58.1	29.2939	11.4459	1.34251	1.37445	4.86868	4.7
		log(2.25)	-65.19(0.07)	-38.47(0.17)	2.13(0.38)	2.58(0.38)	-5.80(0.73)	-22.08(0.47)	0	0.1	92.1	91.2	91.4	51.6	42.5474	15.0718	1.47411	1.50087	5.69645	7.04
		log(2.50)	-75.23(0.07)	-42.69(0.18)	0.77(0.38)	1.29(0.38)	-7.07(0.76)	-27.05(0.50)	0	0	93.7	93.6	89.5	44.6	56.6474	18.542	1.44433	1.46262	6.33185	9.79
	0.3	log(1.50)	-27.13(0.08)	-16.99(0.18)	4.74(0.37)	4.85(0.39)	-4.17(0.68)	-7.41(0.35)	0	21.7	90.8	90.7	94.2	84	7.41941	3.21584	1.56703	1.75091	4.80657	1.76
		log(1.75)	-41.12(0.08)	-23.44(0.19)	4.52(0.38)	4.81(0.38)	-4.57(0.69)	-11.81(0.39)	0	6.7	90.3	90.1	94.4	73.9	16.9657	5.84821	1.67078	1.70731	4.95674	2.93
		log(2.00)	-53.45(0.08)	-28.95(0.20)	3.40(0.39)	3.76(0.39)	-6.56(0.71)	-16.03(0.43)	0	2.9	91.5	91.2	92.6	66	28.6262	8.76486	1.62927	1.66437	5.48476	4.4
		log(2.25)	-64.46(0.08)	-33.74(0.20)	2.41(0.38)	2.83(0.39)	-6.94(0.74)	-20.23(0.47)	0	1.4	91.9	91.5	93.2	59.1	41.6079	11.7844	1.5365	1.5674	5.9103	6.34
		log(2.50)	-74.42(0.08)	-37.82(0.22)	1.25(0.41)	1.73(0.41)	-7.88(0.75)	-24.08(0.55)	0	0.8	93.3	93	93.6	53.4	55.4389	14.7652	1.70614	1.72853	6.2882	8.82

## Sheet: Table S7
Table S7 Comparison of operating characteristics under Scenario 4 (exponential high scale scenario) for VIBPe, naive, x-only, and two-stage methods.
N_sample	P_censor	βx	bias*100(se*100)				Coverage rate(%)				MSE*100
			Naive	VIBPe	x_only	two-stage	Naive	VIBPe	x_only	two-stage	Naive	VIBPe	x_only	two-stage
50	0.1	log(1.50)	-27.35(0.07)	0.38(0.20)	-4.45(0.31)	-11.54(0.26)	0	94.7	90	57.4	7.52967	0.394009	1.16396	1.98
		log(1.75)	-40.83(0.07)	0.29(0.24)	-4.93(0.38)	-19.06(0.31)	0	92.7	89.5	39.5	16.7245	0.59992	1.64936	4.6
		log(2.00)	-53.01(0.08)	0.17(0.22)	-5.91(0.40)	-27.66(0.34)	0	93.7	88.7	23.7	28.16	0.489671	1.95724	8.84
		log(2.25)	-64.02(0.08)	-0.12(0.26)	-5.98(0.45)	-36.19(0.37)	0	92.7	90.4	14.2	41.0445	0.669081	2.35526	14.48
		log(2.50)	-74.05(0.08)	-0.27(0.27)	-6.61(0.47)	-44.59(0.39)	0	93	90.3	9.6	54.8875	0.71647	2.6294	21.37
	0.3	log(1.50)	-26.69(0.08)	0.80(0.20)	-3.33(0.35)	-10.34(0.26)	0	93.8	90.9	66.4	7.18774	0.415495	1.30994	1.75
		log(1.75)	-40.00(0.08)	0.20(0.22)	-3.95(0.40)	-18.35(0.30)	0	93.9	91.6	43.6	16.0634	0.482306	1.74166	4.28
		log(2.00)	-52.03(0.08)	-0.26(0.22)	-4.56(0.42)	-26.83(0.34)	0	95.5	92.3	25.8	27.1381	0.47177	1.94696	8.33
		log(2.25)	-62.97(0.08)	-0.62(0.26)	-4.96(0.46)	-34.93(0.36)	0	94.6	91.6	14.7	39.7167	0.65765	2.33126	13.52
		log(2.50)	-72.92(0.08)	-0.89(0.25)	-5.28(0.49)	-42.58(0.39)	0	94.6	92.8	10	53.2472	0.617629	2.6944	19.65
100	0.1	log(1.50)	-27.28(0.05)	-0.07(0.14)	-3.22(0.22)	-9.46(0.17)	0	94	91.7	53.8	7.46585	0.209404	0.576474	1.17
		log(1.75)	-40.75(0.05)	-0.78(0.21)	-4.44(0.24)	-17.38(0.19)	0	95	89.3	20.7	16.6263	0.439469	0.758583	3.4
		log(2.00)	-52.90(0.05)	-0.71(0.21)	-5.10(0.27)	-25.59(0.21)	0	93	88	7.8	28.0134	0.427757	1.00435	6.99
		log(2.25)	-63.91(0.05)	-0.98(0.22)	-5.84(0.29)	-33.83(0.23)	0	93.4	86.8	2.8	40.8732	0.514482	1.20203	11.96
		log(2.50)	-73.92(0.05)	-0.89(0.22)	-5.87(0.31)	-42.01(0.25)	0	93.4	89	0.6	54.67	0.489947	1.31315	18.25
	0.3	log(1.50)	-26.62(0.05)	-0.03(0.13)	-2.73(0.23)	-8.41(0.17)	0	95.5	91.6	61.1	7.11655	0.159014	0.62025	0.99
		log(1.75)	-39.88(0.06)	-0.73(0.14)	-3.89(0.26)	-15.77(0.21)	0	94.5	90.5	31.3	15.9325	0.200972	0.819381	2.92
		log(2.00)	-51.91(0.06)	-1.39(0.15)	-4.83(0.29)	-23.83(0.22)	0	94.5	88.8	12.4	26.9784	0.235491	1.08807	6.17
		log(2.25)	-62.84(0.06)	-2.28(0.24)	-5.36(0.33)	-31.81(0.23)	0	92.8	87.9	4.4	39.5167	0.627602	1.37576	10.67
		log(2.50)	-72.79(0.06)	-2.24(0.26)	-5.65(0.35)	-39.38(0.26)	0	93.2	88.7	1.9	53.0222	0.750108	1.56908	16.17
200	0.1	log(1.50)	-27.24(0.03)	-0.42(0.10)	-3.80(0.15)	-8.34(0.12)	0	93.9	85.2	37.9	7.43147	0.0956286	0.359529	0.83
		log(1.75)	-40.71(0.04)	-0.81(0.11)	-4.98(0.16)	-16.06(0.13)	0	94.6	83.3	7.1	16.5821	0.129839	0.507512	2.76
		log(2.00)	-52.87(0.04)	-1.23(0.15)	-5.94(0.19)	-24.41(0.15)	0	93.5	78.9	0.7	27.9638	0.253468	0.701733	6.17
		log(2.25)	-63.88(0.04)	-1.78(0.24)	-6.49(0.20)	-32.74(0.15)	0	92	80.4	0.1	40.8252	0.616387	0.806823	10.95
		log(2.50)	-73.90(0.04)	-1.58(0.19)	-7.53(0.22)	-40.63(0.17)	0	93.9	76.8	0	54.6253	0.371591	1.0484	16.79
	0.3	log(1.50)	-26.58(0.04)	-0.44(0.09)	-3.13(0.16)	-7.36(0.12)	0	94.1	89.2	50	7.07791	0.0877578	0.362518	0.68
		log(1.75)	-39.82(0.04)	-1.13(0.10)	-3.88(0.18)	-14.58(0.14)	0	93.3	88.3	14.3	15.8693	0.105939	0.47358	2.31
		log(2.00)	-51.85(0.04)	-1.67(0.14)	-5.05(0.19)	-22.19(0.15)	0	91.6	86.6	2.9	26.9002	0.220191	0.627371	5.16
		log(2.25)	-62.77(0.04)	-2.24(0.19)	-5.54(0.22)	-30.16(0.17)	0	90.4	84	0.4	39.4225	0.394721	0.782109	9.38
		log(2.50)	-72.73(0.04)	-2.39(0.20)	-5.97(0.24)	-37.75(0.18)	0	91.3	83.5	0.1	52.9135	0.472944	0.950836	14.56

## Sheet: Table S8
Table S8 Comparison of operating characteristics under Scenario 5 (exponential high noise scenario) for VIBPe, naive, x-only, and two-stage methods.
N_sample	P_censor	βx	bias*100(se*100)				Coverage rate(%)				MSE*100
			Naive	VIBPe	x_only	two-stage	Naive	VIBPe	x_only	two-stage	Naive	VIBPe	x_only	two-stage
50	0.1	log(1.50)	-29.20(0.07)	0.64(0.23)	-3.75(0.39)	-12.39(0.31)	0	94.4	93	67.4	8.57333	0.545183	1.66326	2.52
		log(1.75)	-43.07(0.07)	0.30(0.24)	-5.48(0.41)	-20.10(0.38)	0	94.4	90.8	47.8	18.6023	0.562429	2.01553	5.5
		log(2.00)	-55.45(0.07)	-0.07(0.23)	-6.58(0.46)	-27.94(0.40)	0	94.2	89.6	36.7	30.7977	0.541397	2.53238	9.4
		log(2.25)	-66.59(0.07)	-0.42(0.25)	-6.94(0.50)	-35.98(0.44)	0	94.4	89.7	26.4	44.3927	0.606521	2.98263	14.89
		log(2.50)	-76.66(0.07)	-0.63(0.26)	-7.66(0.53)	-43.65(0.46)	0	93.8	90.2	18.7	58.8246	0.671239	3.36376	21.19
	0.3	log(1.50)	-28.59(0.08)	1.39(0.26)	-3.13(0.42)	-11.08(0.35)	0	94.3	92.7	72.3	8.23673	0.673314	1.85412	2.43
		log(1.75)	-42.26(0.08)	0.63(0.26)	-3.88(0.44)	-18.83(0.39)	0	92.9	93.9	55.2	17.9185	0.692141	2.09623	5.05
		log(2.00)	-54.52(0.08)	0.08(0.28)	-3.74(0.51)	-26.00(0.44)	0	93.5	92.7	41.9	29.7882	0.787725	2.73479	8.66
		log(2.25)	-65.55(0.08)	-0.47(0.29)	-4.59(0.53)	-33.70(0.45)	0	93	92.1	31.5	43.0388	0.860722	3.04901	13.42
		log(2.50)	-75.56(0.08)	-1.54(0.30)	-5.45(0.56)	-41.83(0.48)	0	93.3	91.5	22.5	57.1646	0.90506	3.48091	19.75
100	0.1	log(1.50)	-29.28(0.05)	0.22(0.15)	-3.80(0.28)	-9.40(0.22)	0	93.1	89.6	66.9	8.59614	0.2271	0.914127	1.35
		log(1.75)	-43.15(0.05)	-0.46(0.16)	-5.03(0.29)	-17.06(0.25)	0	92.6	87.4	39.8	18.6444	0.261122	1.09748	3.51
		log(2.00)	-55.54(0.05)	-0.69(0.17)	-5.41(0.32)	-24.66(0.27)	0	91.9	87.6	24.5	30.8681	0.302049	1.30163	6.8
		log(2.25)	-66.67(0.05)	-0.93(0.17)	-6.50(0.33)	-32.44(0.30)	0	93.1	87.4	12.5	44.4698	0.312786	1.52441	11.4
		log(2.50)	-76.74(0.05)	-1.12(0.19)	-7.29(0.35)	-39.51(0.32)	0	91.5	87	7.9	58.9188	0.368366	1.78537	16.61
	0.3	log(1.50)	-28.73(0.05)	0.27(0.17)	-2.85(0.29)	-8.71(0.22)	0	94	92	72.6	8.28472	0.305949	0.931948	1.25
		log(1.75)	-42.44(0.05)	-0.53(0.18)	-4.09(0.31)	-15.75(0.25)	0	94.3	90.9	49.4	18.0427	0.309306	1.10854	3.09
		log(2.00)	-54.68(0.06)	-1.17(0.19)	-4.89(0.33)	-23.18(0.27)	0	93.8	92	30	29.9348	0.367264	1.35143	6.1
		log(2.25)	-65.72(0.06)	-1.81(0.20)	-5.90(0.37)	-30.57(0.30)	0	92.4	89.2	17	43.2252	0.414647	1.69349	10.25
		log(2.50)	-75.74(0.06)	-2.17(0.21)	-6.23(0.38)	-37.86(0.32)	0	91.5	89.8	9.2	57.3988	0.48455	1.80851	15.35
200	0.1	log(1.50)	-29.35(0.04)	-0.14(0.10)	-3.71(0.17)	-7.85(0.15)	0	95.9	89.3	60.6	8.62399	0.0937409	0.438114	0.85
		log(1.75)	-43.22(0.04)	-0.63(0.11)	-4.96(0.19)	-14.99(0.18)	0	93.3	86.3	27.1	18.6941	0.115887	0.59037	2.57
		log(2.00)	-55.61(0.04)	-1.06(0.12)	-5.84(0.22)	-22.65(0.19)	0	92.9	81.9	8.8	30.9362	0.144964	0.828836	5.49
		log(2.25)	-66.74(0.04)	-1.34(0.12)	-6.53(0.22)	-30.40(0.21)	0	92.9	81.7	3.4	44.5557	0.168342	0.907915	9.69
		log(2.50)	-76.82(0.04)	-1.85(0.17)	-7.65(0.24)	-37.99(0.21)	0	92.1	80.7	0.9	59.0245	0.324333	1.15314	14.89
	0.3	log(1.50)	-28.75(0.04)	-0.27(0.12)	-3.07(0.20)	-7.05(0.16)	0	93.6	91.7	68.5	8.27959	0.147328	0.484167	0.74
		log(1.75)	-42.43(0.04)	-1.05(0.13)	-4.24(0.21)	-13.38(0.18)	0	92.4	89.8	39.5	18.0207	0.171964	0.616992	2.13
		log(2.00)	-54.68(0.04)	-1.79(0.13)	-5.36(0.22)	-20.41(0.20)	0	92.3	88.1	16.9	29.9188	0.201703	0.766974	4.56
		log(2.25)	-65.72(0.04)	-2.41(0.14)	-5.82(0.24)	-27.93(0.20)	0	91.2	86.2	5	43.208	0.241557	0.925797	8.2
		log(2.50)	-75.74(0.04)	-2.73(0.14)	-6.35(0.26)	-35.12(0.22)	0	90	86.6	2	57.3764	0.279961	1.06013	12.81

## Sheet: Table S9
Table S9 Comparison of operating characteristics under scenario 9 (Weibull high scale scenario) for the VIBPe, VIBPwg, VIBPwl, naive, x-only, and two-stage methods.
Rho	P_censor	βx	bias*100(se*100)						Coverage rate(%)						MSE*100
			Naive	VIBPe	VIBPwg	VIBPwl	x_only	two-stage	Naive	VIBPe	VIBPwg	VIBPwl	x_only	two-stage	Naive	VIBPe	VIBPwg	VIBPwl	x_only	two-stage
0.5	0.1	log(1.50)	-27.20(0.05)	43.87(0.28)	-0.01(0.15)	0.27(0.15)	-3.83(0.21)	-9.12(0.16)	0	5.2	94.6	93.9	88.9	55.2	7.42268	20.0111	0.211325	0.215415	0.586826	1.1
		log(1.75)	-40.67(0.05)	42.61(0.42)	-1.33(0.17)	-1.00(0.17)	-4.72(0.24)	-16.85(0.20)	0	39.8	93.5	93.6	87.9	25.5	16.5657	19.9364	0.314517	0.308892	0.820605	3.24
		log(2.00)	-52.85(0.05)	22.96(1.19)	-3.25(0.19)	-2.95(0.19)	-5.55(0.27)	-25.28(0.22)	0	89.8	93.1	93.5	87.7	9.1	27.9554	19.378	0.458022	0.437436	1.03666	6.86
		log(2.25)	-63.88(0.05)	-25.32(1.80)	-5.06(0.21)	-4.85(0.21)	-5.93(0.30)	-33.40(0.22)	0	99.2	89.7	89.5	85.4	2.5	40.8265	38.7175	0.701411	0.665275	1.28175	11.66
		log(2.50)	-73.90(0.05)	-74.96(1.33)	-7.15(0.23)	-7.26(0.21)	-6.57(0.33)	-41.74(0.24)	0	92.1	88.3	86.5	86.5	0.2	54.6336	73.8308	1.02129	0.98585	1.5279	17.99
	0.3	log(1.50)	-26.47(0.05)	42.13(0.32)	0.11(0.15)	0.38(0.16)	-2.81(0.24)	-7.99(0.17)	0	21.4	95.9	95.6	92.2	64.4	7.03482	18.7786	0.240183	0.245801	0.637976	0.93
		log(1.75)	-39.75(0.05)	25.65(0.81)	-1.77(0.18)	-1.36(0.18)	-3.99(0.25)	-15.41(0.20)	0	80.4	94.3	94.3	91	34	15.8336	13.2211	0.339369	0.332209	0.802325	2.79
		log(2.00)	-51.79(0.06)	-34.64(1.28)	-4.01(0.19)	-3.52(0.19)	-4.86(0.28)	-23.24(0.23)	0	97.3	92.3	92.9	88.8	13.9	26.8549	28.363	0.52847	0.496847	1.02281	5.91
		log(2.25)	-62.73(0.06)	-78.11(0.48)	-6.32(0.21)	-5.84(0.21)	-5.47(0.31)	-31.25(0.24)	0	58.5	88.3	90	89	5.2	39.3777	63.2938	0.846814	0.788595	1.2675	10.35
		log(2.50)	-72.69(0.06)	-91.31(0.17)	-8.56(0.23)	-8.18(0.24)	-5.79(0.34)	-39.10(0.26)	0	11.1	84.2	84.8	88.8	1.8	52.8768	83.6424	1.23971	1.24224	1.47037	15.95
1	0.1	log(1.50)	-27.27(0.05)	-0.07(0.15)	-0.06(0.15)	0.16(0.15)	-3.22(0.22)	-9.39(0.16)	0	93.8	94.3	93.7	90.8	53.1	7.45747	0.211735	0.215293	0.219838	0.583311	1.15
		log(1.75)	-40.72(0.05)	-0.79(0.21)	-1.70(0.17)	-1.35(0.17)	-4.49(0.23)	-17.24(0.20)	0	94.7	93.7	94	89.6	21.6	16.6079	0.441256	0.301291	0.298784	0.741845	3.36
		log(2.00)	-52.88(0.05)	-0.71(0.21)	-3.24(0.19)	-2.75(0.20)	-5.04(0.28)	-25.48(0.21)	0	92.9	91.7	92.8	87.5	8.4	27.9887	0.429663	0.482553	0.470829	1.01089	6.94
		log(2.25)	-63.89(0.05)	-1.05(0.25)	-5.35(0.20)	-4.70(0.21)	-5.95(0.29)	-33.59(0.23)	0	93.1	89.2	91.1	87.1	2.8	40.8403	0.613783	0.689467	0.653083	1.1973	11.8
		log(2.50)	-73.90(0.05)	-1.02(0.25)	-7.25(0.22)	-6.36(0.23)	-6.12(0.31)	-41.89(0.25)	0	93.7	86.2	90.7	88.1	0.8	54.6349	0.614288	1.00257	0.932431	1.33913	18.18
	0.3	log(1.50)	-26.60(0.05)	-0.02(0.12)	-0.08(0.15)	0.13(0.15)	-2.74(0.23)	-8.54(0.17)	0	96.1	94.8	94.8	92.3	60.4	7.10536	0.155813	0.231072	0.235347	0.61358	1.01
		log(1.75)	-39.85(0.06)	-0.61(0.14)	-1.81(0.18)	-1.48(0.18)	-3.96(0.26)	-15.71(0.21)	0	94.2	94.3	94.1	90.4	31.3	15.9118	0.201015	0.348126	0.345189	0.829641	2.9
		log(2.00)	-51.88(0.06)	-1.23(0.15)	-4.06(0.19)	-3.61(0.19)	-4.82(0.29)	-23.91(0.22)	0	94.8	91.8	93.1	89.4	11.9	26.9516	0.227433	0.52785	0.505426	1.0519	6.21
		log(2.25)	-62.83(0.06)	-2.01(0.22)	-6.69(0.21)	-6.09(0.21)	-5.36(0.33)	-31.84(0.24)	0	92.4	87.4	89	87.7	4.5	39.505	0.526839	0.869975	0.812977	1.39127	10.7
		log(2.50)	-72.78(0.06)	-1.94(0.24)	-8.77(0.22)	-8.00(0.23)	-5.54(0.36)	-39.28(0.26)	0	93.2	82.1	85.5	88.3	2	53.003	0.617815	1.27345	1.17669	1.59366	16.12
1.5	0.1	log(1.50)	-27.35(0.05)	-17.99(0.07)	-0.07(0.15)	0.10(0.15)	-3.24(0.22)	-9.39(0.16)	0	0	93	93.4	91	52.5	7.50252	3.28877	0.214192	0.214994	0.600942	1.15
		log(1.75)	-40.83(0.05)	-23.56(0.08)	-1.59(0.16)	-1.31(0.16)	-4.19(0.24)	-17.34(0.19)	0	0	94.8	94.7	89.4	21.5	16.6918	5.62233	0.294473	0.287717	0.774127	3.37
		log(2.00)	-52.98(0.05)	-28.13(0.09)	-3.30(0.18)	-2.86(0.18)	-4.72(0.28)	-25.79(0.21)	0	0	92.6	93.2	87.2	7	28.0967	7.99721	0.443102	0.419298	0.983839	7.1
		log(2.25)	-63.98(0.05)	-31.97(0.12)	-5.40(0.20)	-4.78(0.20)	-5.66(0.29)	-33.91(0.23)	0	0	90.1	91.5	87.4	2.3	40.959	10.3565	0.684567	0.628842	1.18535	12.04
		log(2.50)	-73.99(0.05)	-35.52(0.20)	-7.57(0.24)	-6.62(0.22)	-6.17(0.31)	-41.81(0.24)	0	0	85.2	88.7	88.1	0.7	54.769	13.0018	1.15501	0.929953	1.35792	18.08
	0.3	log(1.50)	-26.76(0.05)	-15.85(0.09)	0.01(0.16)	0.17(0.16)	-2.56(0.24)	-8.47(0.17)	0	0.1	94.6	94.7	91.7	63.5	7.18654	2.58787	0.250685	0.252734	0.657603	1.02
		log(1.75)	-40.05(0.05)	-21.70(0.09)	-1.76(0.18)	-1.51(0.18)	-3.65(0.26)	-15.96(0.20)	0	0	95.3	95.2	91.8	29.1	16.0725	4.79181	0.341665	0.334849	0.809628	2.95
		log(2.00)	-52.07(0.06)	-26.50(0.10)	-3.78(0.19)	-3.41(0.19)	-4.52(0.30)	-23.91(0.22)	0	0	93	93.5	89.2	11.9	27.1457	7.12739	0.50363	0.47987	1.11266	6.2
		log(2.25)	-62.98(0.06)	-30.54(0.11)	-6.07(0.20)	-5.55(0.20)	-5.09(0.32)	-31.94(0.24)	0	0	89	90.6	89.4	4.3	39.6925	9.45044	0.776557	0.721568	1.30217	10.79
		log(2.50)	-72.92(0.06)	-34.02(0.12)	-8.49(0.22)	-7.80(0.22)	-5.85(0.34)	-39.90(0.27)	0	0	85.6	87.9	89	1.7	53.202	11.72	1.21175	1.10806	1.46886	16.62

## Sheet: Table S10
Table S10 Comparison of operating characteristics under scenario 10 (Weibull high noise scenario) for the VIBPe, VIBPwg, VIBPwl, naive, x-only, and two-stage methods.
Rho	P_censor	βx	bias*100(se*100)						Coverage rate(%)						MSE*100
			Naive	VIBPe	VIBPwg	VIBPwl	x_only	two-stage	Naive	VIBPe	VIBPwg	VIBPwl	x_only	two-stage	Naive	VIBPe	VIBPwg	VIBPwl	x_only	two-stage
0.5	0.1	log(1.50)	-29.20(0.05)	50.72(0.31)	0.00(0.18)	0.31(0.18)	-4.45(0.26)	-9.44(0.21)	0	4.2	93.9	94.1	90	66	8.54778	26.6721	0.326027	0.332156	0.849923	1.34
		log(1.75)	-43.07(0.05)	50.35(0.38)	-0.97(0.20)	-0.55(0.21)	-5.50(0.28)	-16.19(0.24)	0	17.3	92.8	92.7	89.7	44.9	18.5734	26.7848	0.425145	0.424689	1.06958	3.21
		log(2.00)	-55.47(0.05)	46.72(0.53)	-2.94(0.22)	-2.49(0.22)	-6.86(0.30)	-24.33(0.27)	0	50.6	93.2	93.4	86.6	23.5	30.7942	24.6449	0.550867	0.529044	1.35328	6.67
		log(2.25)	-66.61(0.05)	33.46(1.09)	-4.78(0.23)	-4.35(0.23)	-7.34(0.32)	-32.18(0.30)	0	85.9	91.1	92.4	85.2	13.1	44.392	22.9752	0.77134	0.731676	1.54859	11.23
		log(2.50)	-76.69(0.05)	-3.13(1.87)	-6.56(0.25)	-6.19(0.25)	-7.98(0.36)	-39.86(0.31)	0	98.3	89.4	89.8	85.3	7.3	58.8427	34.9164	1.05471	1.00005	1.89704	16.87
	0.3	log(1.50)	-28.60(0.05)	50.37(0.34)	0.60(0.20)	0.91(0.20)	-3.15(0.29)	-8.45(0.23)	0	9.5	93.6	93.7	91.3	72	8.21031	26.5612	0.399334	0.410841	0.916359	1.26
		log(1.75)	-42.28(0.05)	46.09(0.53)	-0.89(0.22)	-0.47(0.22)	-4.26(0.30)	-14.93(0.26)	0	40.8	93.8	94.1	90.6	52.6	17.9059	24.0415	0.470313	0.47227	1.089	2.92
		log(2.00)	-54.54(0.06)	22.24(1.12)	-3.01(0.22)	-2.47(0.22)	-4.98(0.32)	-22.48(0.27)	0	83.9	93.6	93.8	90.3	30.7	29.7739	17.4449	0.569457	0.548216	1.28686	5.79
		log(2.25)	-65.60(0.06)	-26.54(1.55)	-5.50(0.23)	-4.86(0.23)	-5.66(0.34)	-30.34(0.29)	0	95.9	91.8	92.7	91.1	17.9	43.0642	31.2203	0.840924	0.784027	1.50574	10.04
		log(2.50)	-75.63(0.06)	-73.98(1.16)	-7.75(0.25)	-7.08(0.25)	-6.12(0.37)	-37.56(0.32)	0	80.5	86.4	88	90.7	10.5	57.235	68.2496	1.23945	1.14648	1.77503	15.11
1	0.1	log(1.50)	-29.26(0.05)	0.13(0.15)	0.34(0.19)	0.59(0.19)	-3.98(0.27)	-9.52(0.22)	0	93.4	93.5	93.2	90.2	66.6	8.58529	0.223278	0.347804	0.35621	0.913147	1.38
		log(1.75)	-43.14(0.05)	-0.51(0.16)	-1.12(0.21)	-0.77(0.21)	-5.07(0.29)	-17.00(0.25)	0	92.4	93.3	93.4	87.6	39.8	18.6363	0.260856	0.437244	0.440291	1.07742	3.52
		log(2.00)	-55.53(0.05)	-0.74(0.17)	-2.38(0.23)	-1.90(0.23)	-5.26(0.32)	-24.73(0.27)	0	91.8	92.2	92.2	86.9	24.2	30.8635	0.308252	0.576445	0.572533	1.32769	6.85
		log(2.25)	-66.65(0.05)	-1.09(0.17)	-4.40(0.23)	-3.79(0.24)	-6.23(0.34)	-32.64(0.30)	0	93.3	91.3	92.1	88.1	11.8	44.4548	0.316841	0.737525	0.712776	1.52609	11.53
		log(2.50)	-76.74(0.05)	-1.24(0.19)	-6.28(0.26)	-5.53(0.26)	-7.27(0.36)	-39.77(0.31)	0	91.6	87.9	90.6	86.9	7.6	58.9115	0.369216	1.0474	0.997626	1.81952	16.81
	0.3	log(1.50)	-28.73(0.05)	0.04(0.17)	0.43(0.20)	0.66(0.20)	-2.99(0.30)	-8.92(0.22)	0	94.1	94.2	93.7	91.8	72.7	8.28383	0.296588	0.405199	0.414492	0.976847	1.27
		log(1.75)	-42.44(0.06)	-0.68(0.18)	-1.03(0.21)	-0.69(0.21)	-3.81(0.31)	-15.76(0.25)	0	93.8	94.5	94.7	90.8	49.5	18.0458	0.319943	0.45922	0.462608	1.11481	3.1
		log(2.00)	-54.69(0.06)	-1.29(0.18)	-2.87(0.22)	-2.42(0.22)	-4.87(0.33)	-23.10(0.27)	0	94.4	94.4	94.7	92.3	30	29.9454	0.35593	0.574411	0.564162	1.32797	6.08
		log(2.25)	-65.74(0.06)	-1.96(0.19)	-5.25(0.24)	-4.69(0.24)	-5.89(0.36)	-30.66(0.30)	0	92	92	92.8	89.8	16.5	43.2444	0.417213	0.843041	0.80605	1.6763	10.29
		log(2.50)	-75.75(0.06)	-2.33(0.21)	-7.28(0.25)	-6.58(0.26)	-6.17(0.38)	-38.01(0.31)	0	91.4	89.3	90.9	89.3	9.2	57.4092	0.488859	1.16647	1.09741	1.83056	15.42
1.5	0.1	log(1.50)	-29.32(0.05)	-19.93(0.09)	0.43(0.19)	0.61(0.19)	-3.51(0.28)	-9.23(0.22)	0	0	92.9	92.7	89.5	66.4	8.62083	4.05315	0.368402	0.372212	0.883723	1.33
		log(1.75)	-43.20(0.05)	-26.05(0.10)	-0.89(0.21)	-0.62(0.21)	-4.37(0.29)	-17.21(0.24)	0	0	93.6	93.5	88.9	39.1	18.692	6.88849	0.43467	0.4325	1.03999	3.53
		log(2.00)	-55.58(0.05)	-30.85(0.11)	-2.60(0.23)	-2.22(0.23)	-5.41(0.31)	-25.60(0.26)	0	0	91.7	92.8	88.4	20.5	30.9176	9.64504	0.576088	0.560745	1.2825	7.24
		log(2.25)	-66.70(0.05)	-34.80(0.12)	-4.55(0.24)	-4.03(0.24)	-5.99(0.34)	-32.98(0.29)	0	0	91.5	92.2	87	11.4	44.5178	12.2558	0.783032	0.744321	1.52197	11.73
		log(2.50)	-76.79(0.05)	-38.28(0.13)	-6.95(0.25)	-6.28(0.25)	-7.33(0.35)	-40.86(0.30)	0	0	87.5	89.6	86.7	5.1	58.9863	14.8169	1.10489	1.02959	1.77808	17.57
	0.3	log(1.50)	-28.83(0.05)	-17.55(0.11)	0.35(0.20)	0.53(0.20)	-3.45(0.31)	-8.88(0.23)	0	0.6	94.2	93.7	90.1	70.8	8.34011	3.1959	0.417855	0.421848	1.0646	1.31
		log(1.75)	-42.55(0.06)	-23.45(0.12)	-0.79(0.22)	-0.54(0.22)	-3.89(0.32)	-15.41(0.25)	0	0	94	94	90	50.3	18.1394	5.64106	0.488844	0.488097	1.18544	3
		log(2.00)	-54.82(0.06)	-28.55(0.13)	-3.01(0.23)	-2.67(0.23)	-5.07(0.34)	-23.46(0.28)	0	0	93.6	93.7	90.2	27.7	30.0837	8.32124	0.630993	0.615165	1.44253	6.29
		log(2.25)	-65.87(0.06)	-32.66(0.14)	-5.05(0.25)	-4.60(0.25)	-5.37(0.37)	-30.64(0.30)	0	0	90.5	91.6	90.3	17.1	43.4166	10.8559	0.87597	0.837475	1.63114	10.32
		log(2.50)	-75.88(0.06)	-36.13(0.15)	-7.22(0.25)	-6.64(0.25)	-5.67(0.38)	-37.99(0.33)	0	0	88.7	90.2	91.2	10.4	57.609	13.2694	1.12874	1.05659	1.75448	15.51

[truncated: 1 more sheets: Table S11]
